# Supplementary material
Source: PubMed Central journal article supplement (PMC3196045)

Supplemental Figure 1: Ching et al., 2011

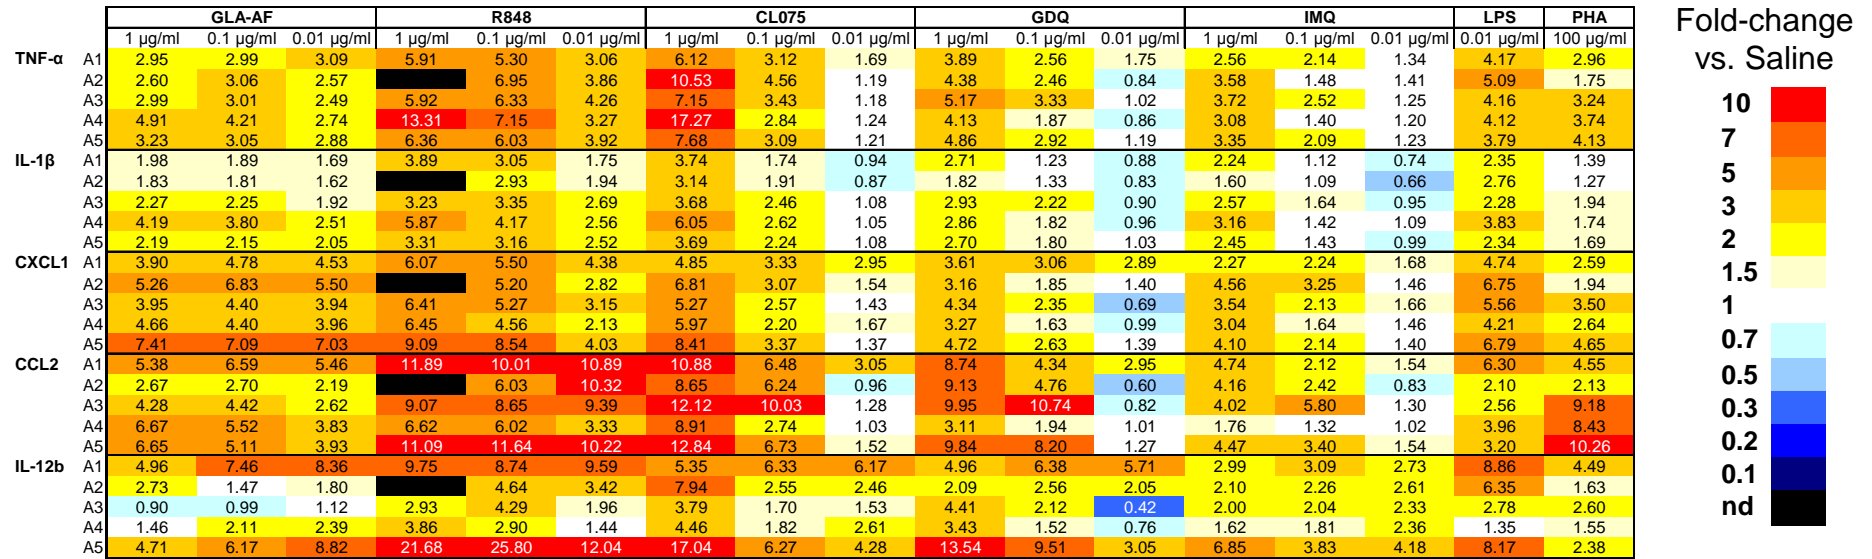

Supplement: NIHMS316925-supplement-01.pdf [file NIHMS316925-supplement-01.pdf]

Supplemental Figure 2: *Ching et al., 2011*

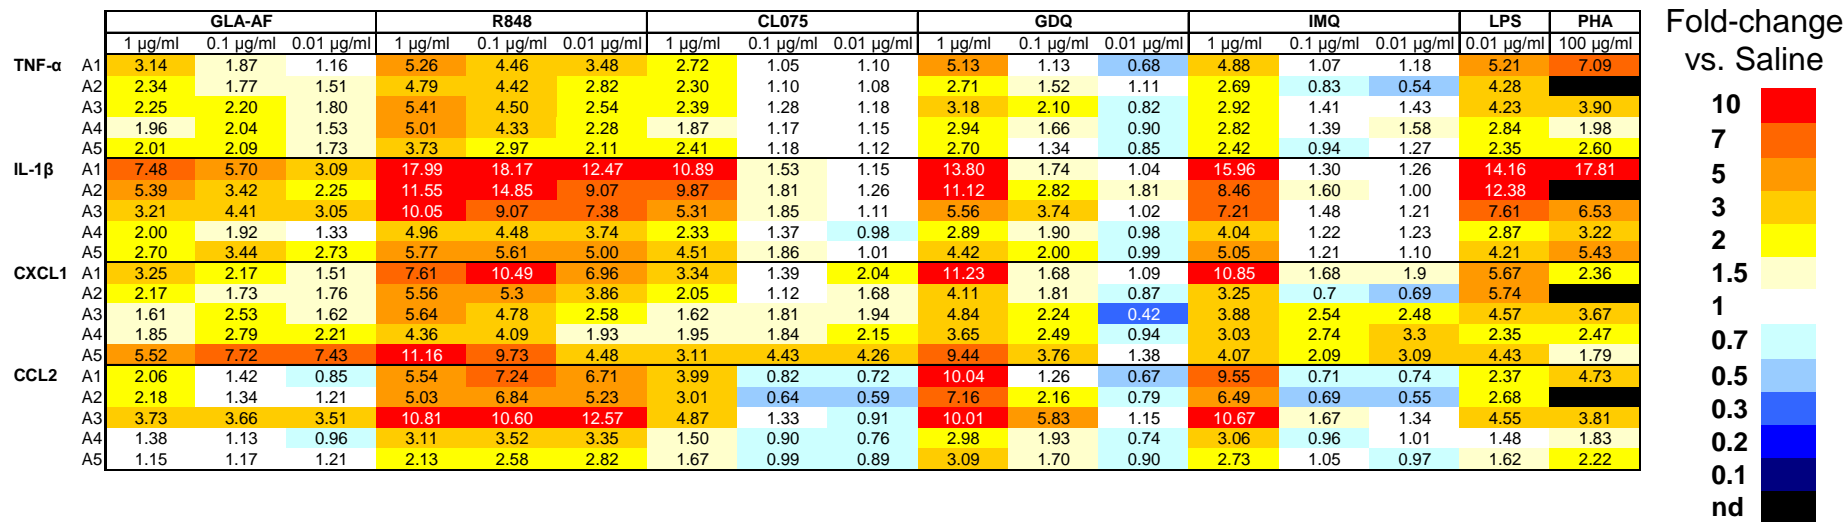

Supplement: NIHMS316925-supplement-02.pdf [file NIHMS316925-supplement-02.pdf]
